# Supplementary material for: NeissLock provides an inducible protein anhydride for covalent targeting of endogenous proteins
Source: PubMed Central journal article supplement (PMC7846742; doi:10.1038/s41467-021-20963-5), 2021-01-29
Supplement: 41467_2021_20963_MOESM1_ESM.pdf [file 41467_2021_20963_MOESM1_ESM.pdf]

# Supplementary Information

## NeissLock provides an inducible protein anhydride for covalent targeting of endogenous proteins

Arne H. A. Scheu<sup>1\*</sup>, Sheryl Y. T. Lim<sup>1\*</sup>, Felix J. Metzner<sup>1,2</sup>, Shabaz Mohammed<sup>1</sup>, and Mark Howarth<sup>1†</sup>

<sup>1</sup>Department of Biochemistry, University of Oxford, South Parks Road, Oxford OX1 3QU, UK. <sup>2</sup>Current address: Gene Center and Department of Biochemistry, Ludwig-Maximilians-Universität München, Feodor-Lynen-Straße 25, 81377, Munich, Germany.

\*Equal contribution †Corresponding author

| PDB ID | Complex                                                                                        | Organism                                     | Resolution (Å) | C-terminal residue       | Target residue            | Primary distance (Å) |
|--------|------------------------------------------------------------------------------------------------|----------------------------------------------|----------------|--------------------------|---------------------------|----------------------|
| 1mox   | Epidermal Growth Factor Receptor / Transforming Growth Factor alpha                            | <i>Homo sapiens</i>                          | 2.5            | Chain D (48 aa)<br>A50   | Chain B (501 aa)<br>K465  | 3.3                  |
| 4zgy   | Ornithine Decarboxylase / Ornithine Decarboxylase Antizyme                                     | <i>Homo sapiens</i>                          | 2.6            | Chain B (125 aa)<br>E219 | Chain A (383 aa)<br>K92   | 3.5                  |
| 1ory   | Flagellar protein FlhS / Flagellin                                                             | <i>Aquifex aeolicus</i>                      | 2.4            | Chain B (40 aa)<br>R2518 | Chain A (119 aa)<br>K1028 | 3.8                  |
| 2qac   | Myosin A tail domain interacting protein MTIP / Myosin-A                                       | <i>Plasmodium falciparum</i>                 | 1.7            | Chain A (144 aa)<br>Q204 | Chain T (14 aa)<br>K813   | 3.9                  |
| 1dml   | DNA polymerase processivity factor / DNA polymerase                                            | <i>Human herpesvirus 1</i>                   | 2.7            | Chain B (36 aa)<br>A1235 | Chain A (267 aa)<br>K289  | 3.9                  |
| 5yqz   | Glucagon receptor / Endolysin / Glucagon analogue                                              | <i>Homo sapiens, Enterobacteria phage T4</i> | 3.0            | Chain P (28 aa)<br>T29   | Chain R (558 aa)<br>K64   | 4.1                  |
| 1syx   | Spliceosomal U5 snRNP-specific 15 kDa protein / CD2 antigen cytoplasmic tail-binding protein 2 | <i>Homo sapiens</i>                          | 2.3            | Chain B (62 aa)<br>T86   | Chain A (135 aa)<br>K125  | 4.3                  |
| 1g0y   | Interleukin-1 receptor Type I / Antagonist peptide AF10847                                     | <i>Homo sapiens</i>                          | 3.0            | Chain I (21 aa)<br>L21   | Chain R (310 aa)<br>K95   | 5.5                  |

**Supplementary Table 1. Summary of example hits to illustrate NeissDist database.**

C-terminal residue: NeissDist selects the last resolved residue in a given polypeptide chain. Target residue: nearest lysine on the partner protein. In parentheses is the resolved chain length as annotated by NeissDist. Primary distance: distance from carbonyl carbon to N $\epsilon$  (see methods for further definition).

| <b>Residue</b> | <b>Predicted pK<sub>a</sub></b> |
|----------------|---------------------------------|
| K21            | 10.2                            |
| K27            | 9.8                             |
| K37            | 10.5                            |
| K50            | 10.4                            |
| K51            | 11.2                            |
| K57            | 10.4                            |
| K69            | 10.0                            |
| K74            | 10.3                            |
| K78            | 10.2                            |
| K92            | 11.1                            |
| K115           | 9.3                             |
| K121           | 10.3                            |
| K141           | 11.3                            |
| K148           | 10.5                            |
| K150           | 11.0                            |
| K169           | 11.8                            |
| K185           | 10.3                            |
| K245           | 10.4                            |
| K247           | 10.6                            |
| K261           | 11.4                            |
| K293           | 10.2                            |
| K294           | 10.2                            |
| K298           | 10.2                            |
| K337           | 10.4                            |
| K342           | 10.4                            |
| K349           | 10.3                            |

**Supplementary Table 2. Predicted pK<sub>a</sub> values of lysine side-chains in ODC.** Values were determined by Rosetta based on the ODC/OAZ crystal structure.

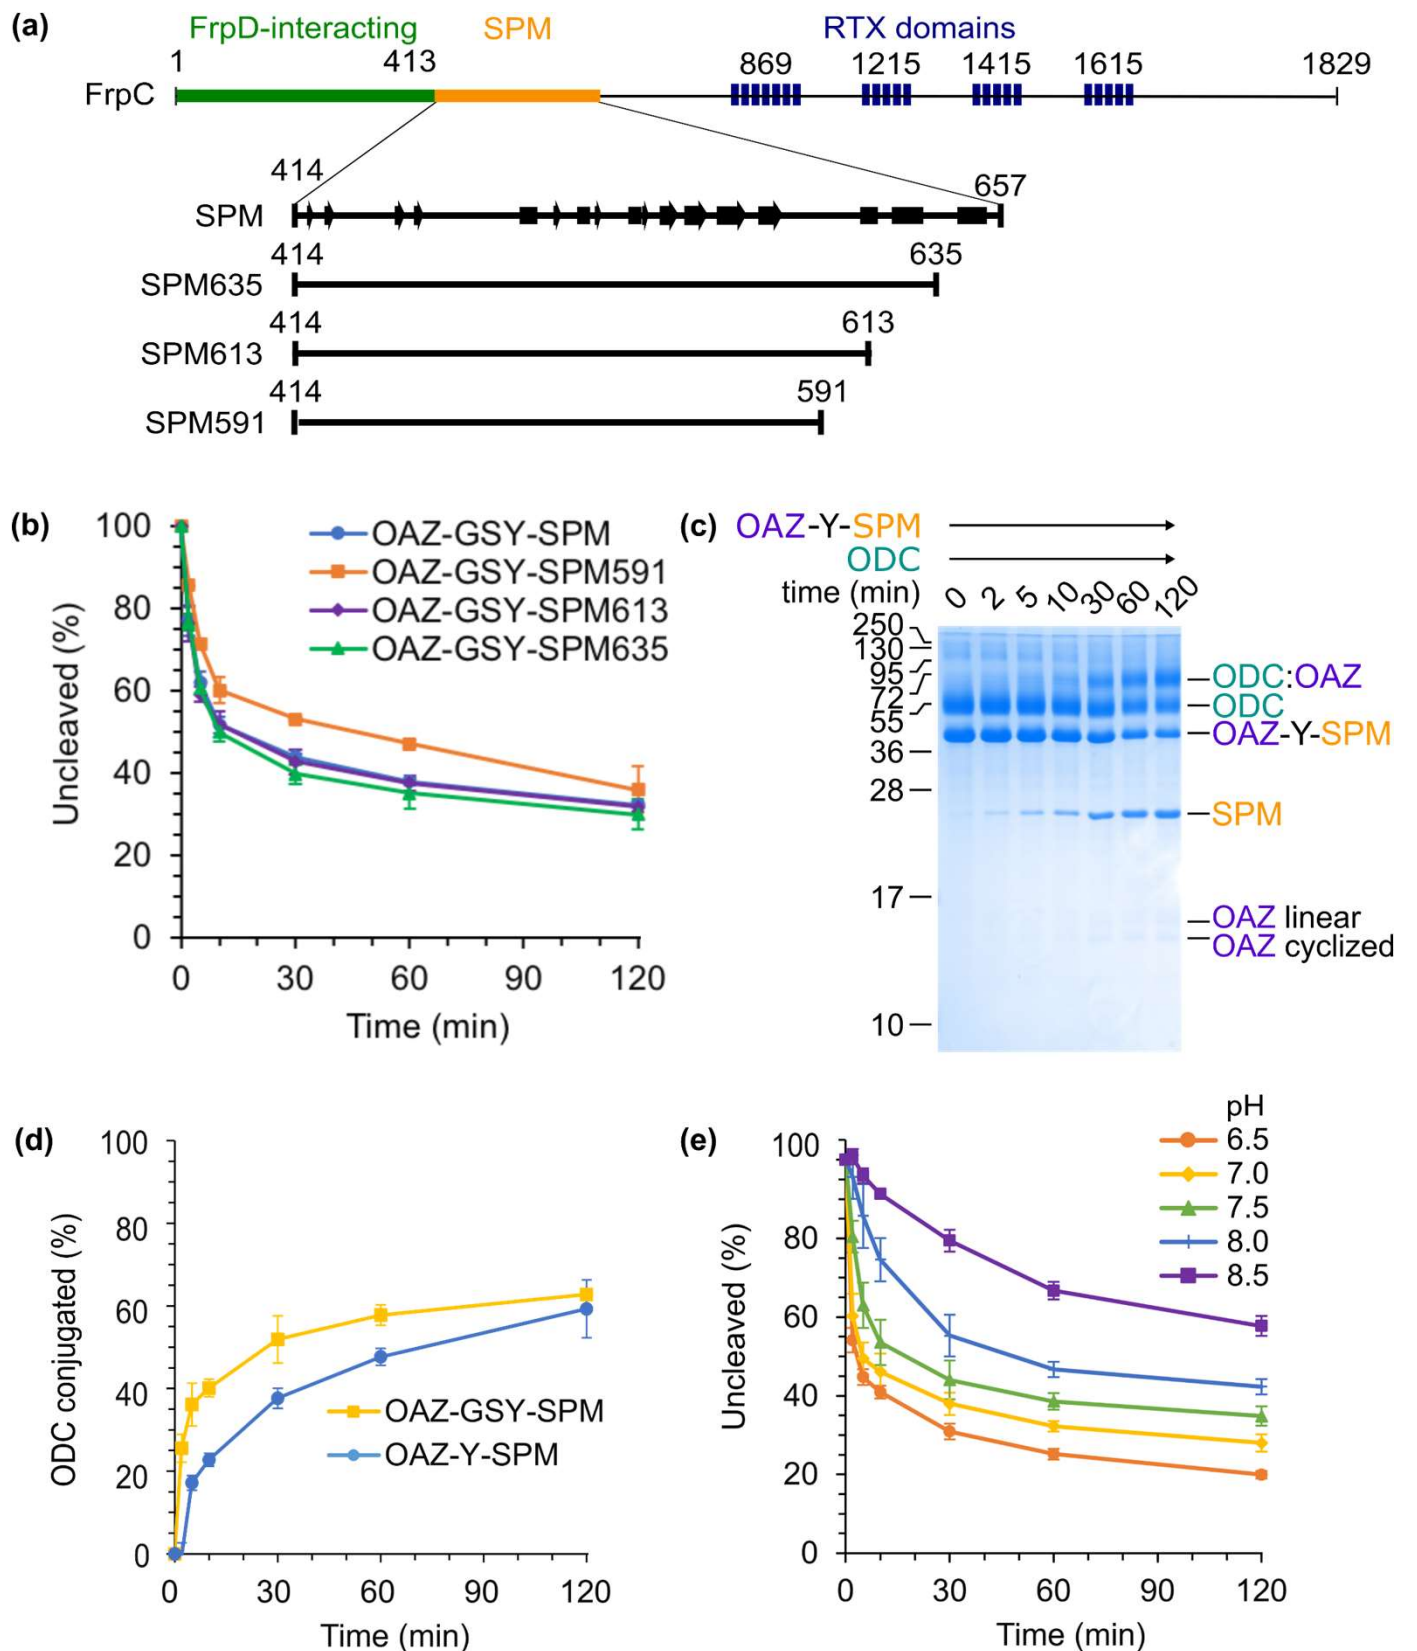

**Supplementary Fig. 1. Effect of SPM truncation, linker length and pH on cleavage or conjugation rate.** (a) Schematic showing truncations of SPM, alongside the regions of FrpC. Secondary structure for FrpC414-657 is from PDB 6sjw or predicted using Jpred for 591-657 ( $\alpha$ -helix as rectangle and  $\beta$ -sheet as arrow). (b) Effect of SPM truncations on cleavage. 10  $\mu$ M OAZ-GSY-SPM or truncated variants were incubated with 10  $\mu$ M ODC in HEPES buffer at 37  $^{\circ}$ C with 10 mM  $\text{Ca}^{2+}$  for the indicated time, before analysis of cleavage by SDS-PAGE with Coomassie stain. (c) Time-course for ODC/OAZ coupling. OAZ-Y-SPM was incubated with ODC for the indicated time in the presence of  $\text{Ca}^{2+}$ , before SDS-PAGE with Coomassie staining. (d) A spacer increased conjugation rate. ODC was incubated with OAZ-Y-SPM or OAZ-GSY-SPM for the indicated time in the presence of  $\text{Ca}^{2+}$ . Coupling to ODC was determined by SDS-PAGE with Coomassie stain. (e) pH-dependence of cleavage. 10  $\mu$ M OAZ-GSY-SPM was incubated with  $\text{Ca}^{2+}$  at 37  $^{\circ}$ C for varying times at the indicated pH. Analysis from SDS-PAGE with Coomassie stain. All error bars are mean of triplicate  $\pm$  1 s.d.; some error bars are too small to be visible. Source data are provided as a Source Data file.

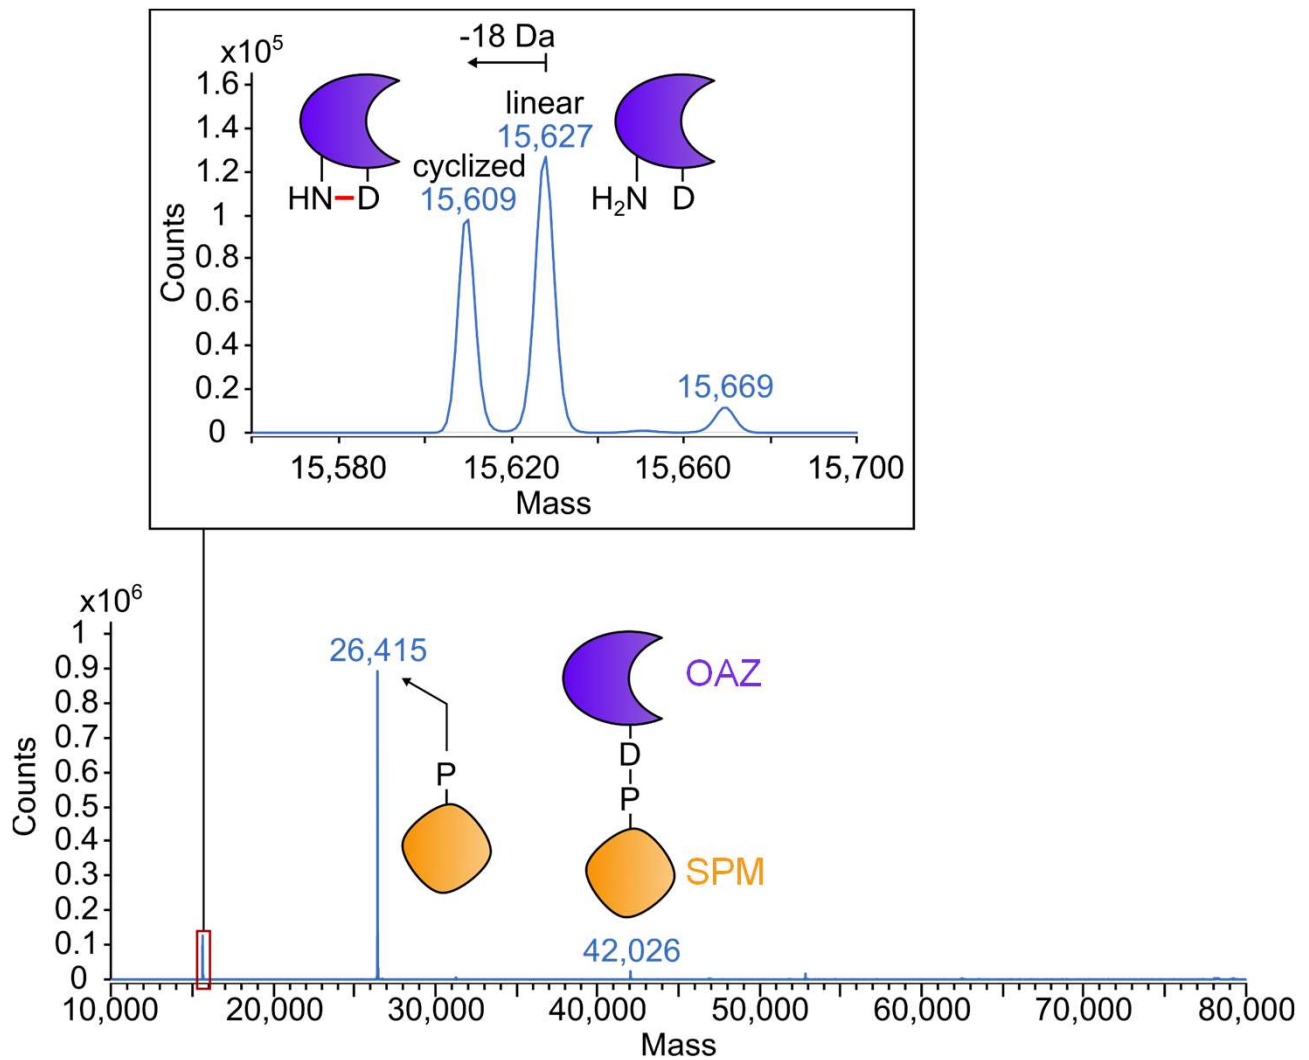

**Supplementary Fig. 2. Identification of linear and cyclized OAZ species.** Intact protein electrospray ionization MS following incubation of OAZ-Y-SPM in the presence of  $\text{Ca}^{2+}$ . Inset: Zoom of the red box shows linear OAZ from hydrolysis of the anhydride and a cyclized species from intramolecular reaction with the anhydride (see cartoon).

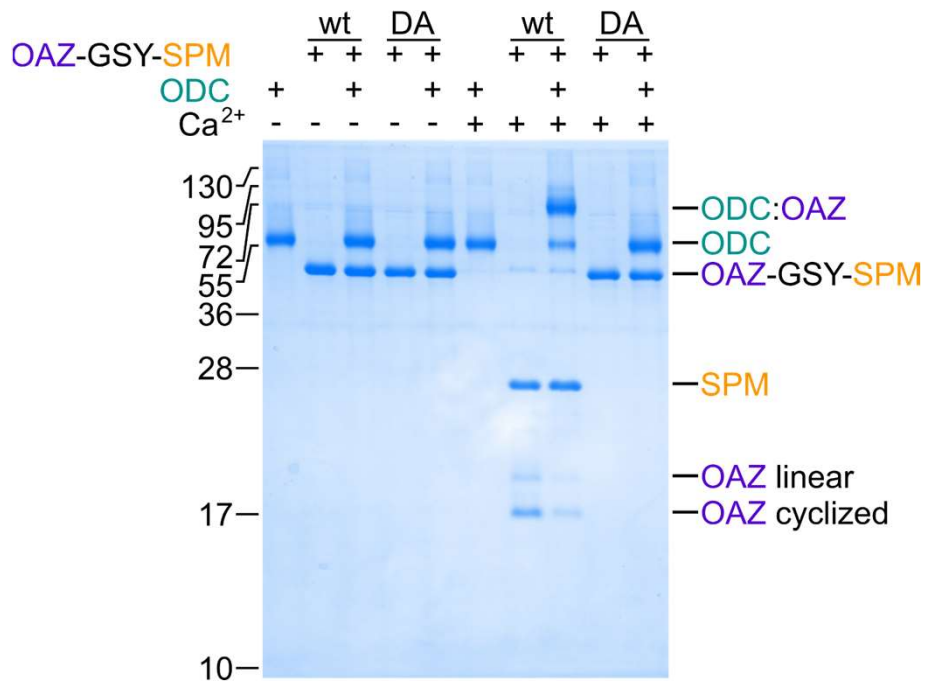

**Supplementary Fig. 3. D414 in SPM was needed for cleavage and coupling.**

10  $\mu$ M ODC was incubated with 10  $\mu$ M OAZ-GSY-SPM with or without D414A mutation at 37 °C in HBS  $\pm$  10 mM Ca<sup>2+</sup>, before SDS-PAGE with Coomassie staining. Source data are provided as a Source Data file.

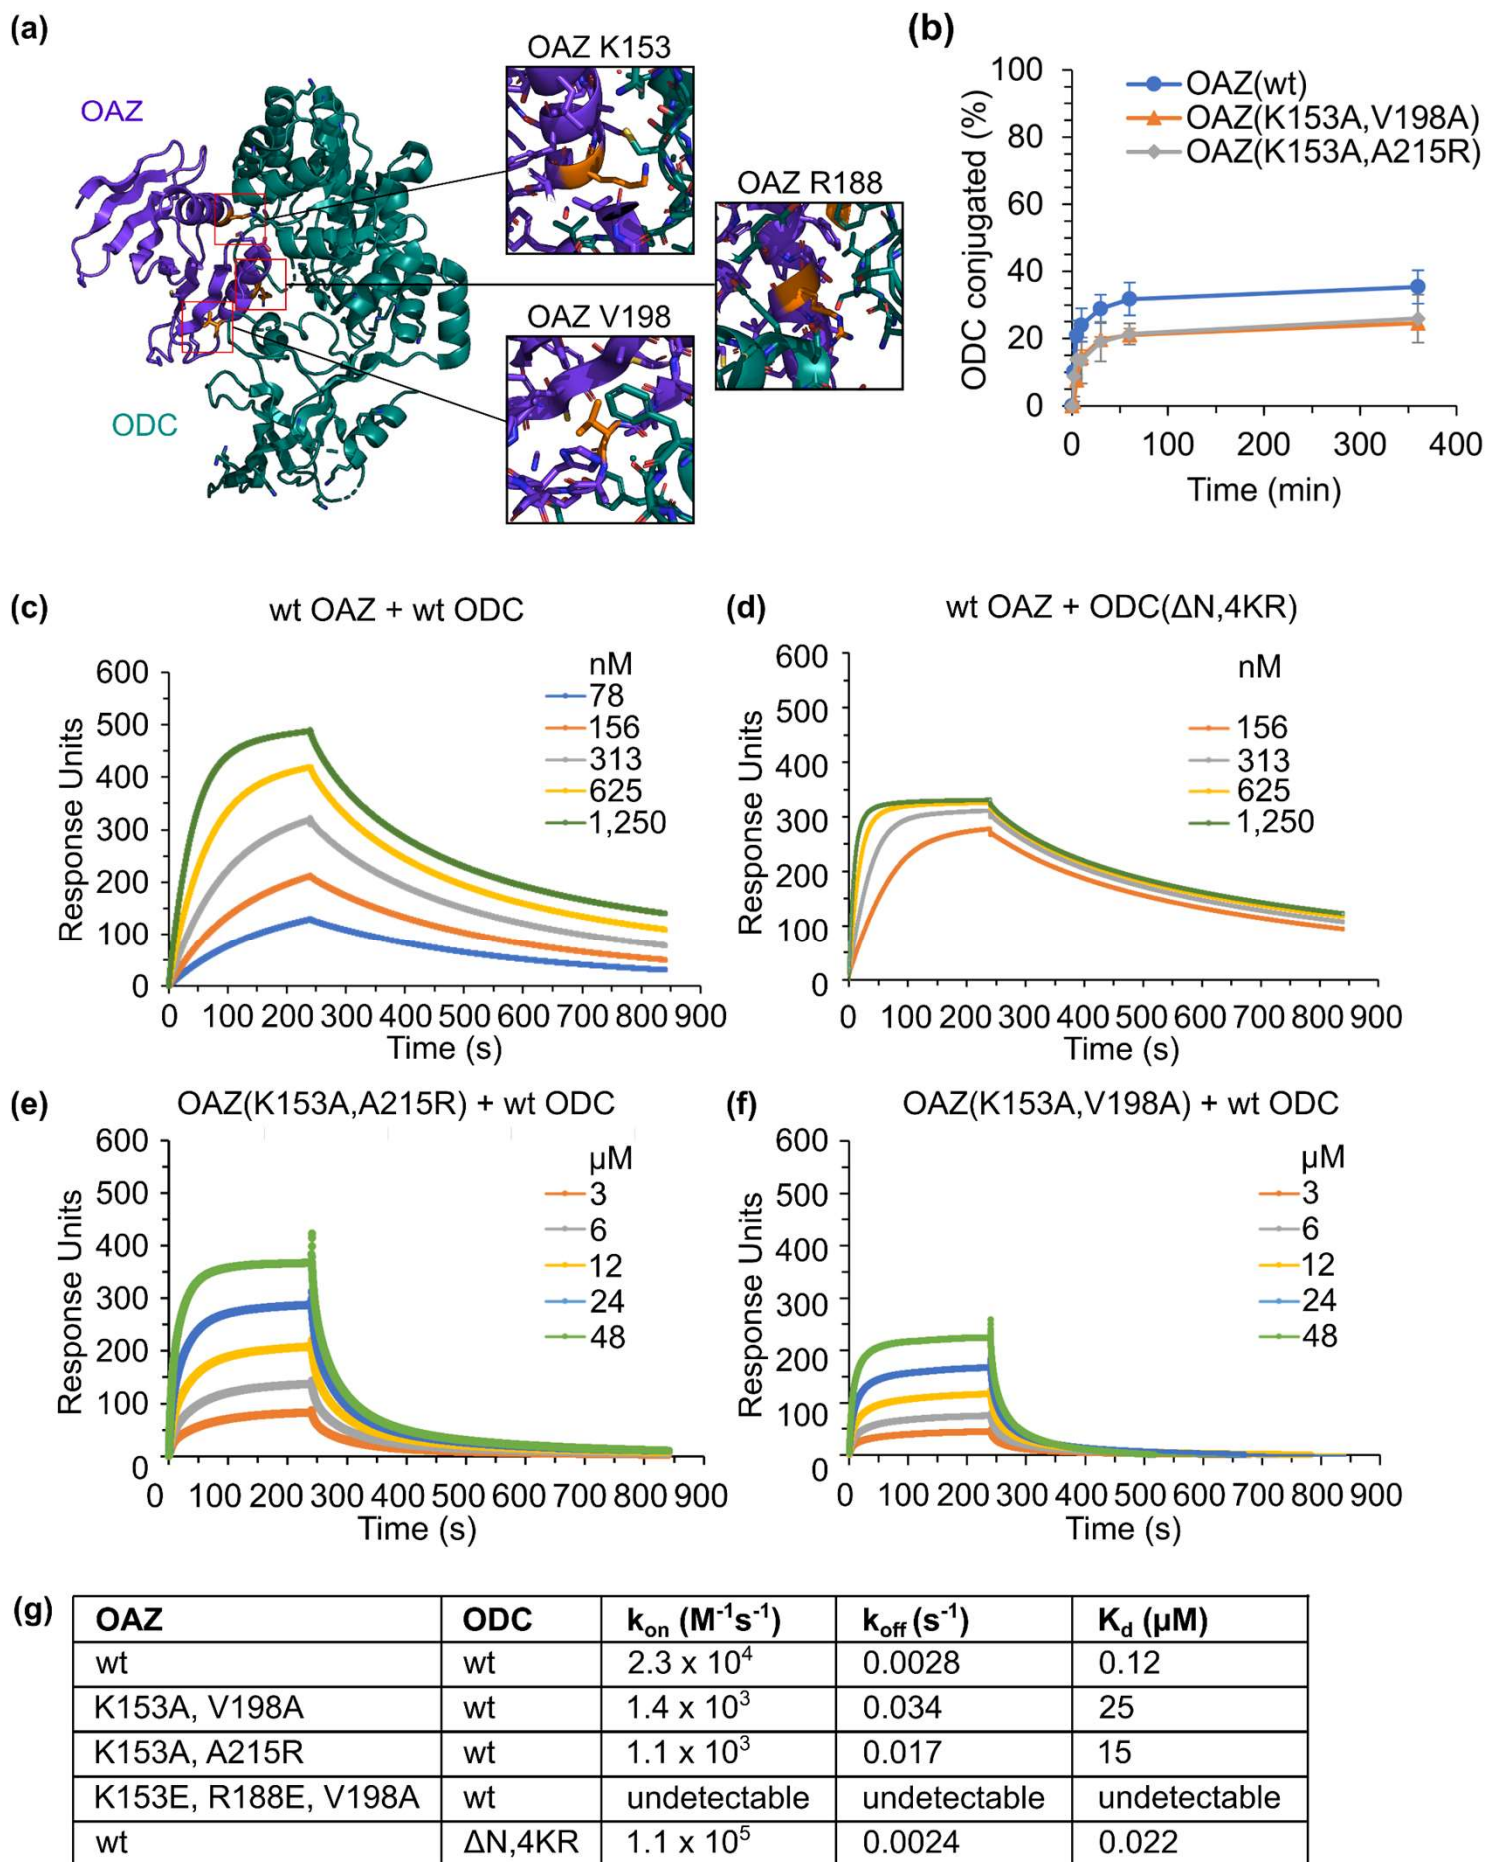

**Supplementary Fig. 4. Non-covalent binding affinity between OAZ-GSY-SPM and ODC.**

(a) Crystal structure of OAZ:ODC complex (PDB 4zgy) with sites for K153A, R188E and V198A mutations inset and marked in orange. These mutations at the binding interface were introduced to OAZ-GSY-SPM to reduce binding affinity to ODC. (b) Conjugation rate of OAZ-GSY-SPM dual mutants to ODC (mean of triplicate  $\pm$  1 s.d.). (c-f) SPR sensorgrams for OAZ-GSY-SPM binding to ODC. Concentrations refer to ODC. Measurements were made at 25 °C without added calcium. (g) Summary of SPR data.  $K_d$  values are representative of two separate experiments. Source data are provided as a Source Data file.

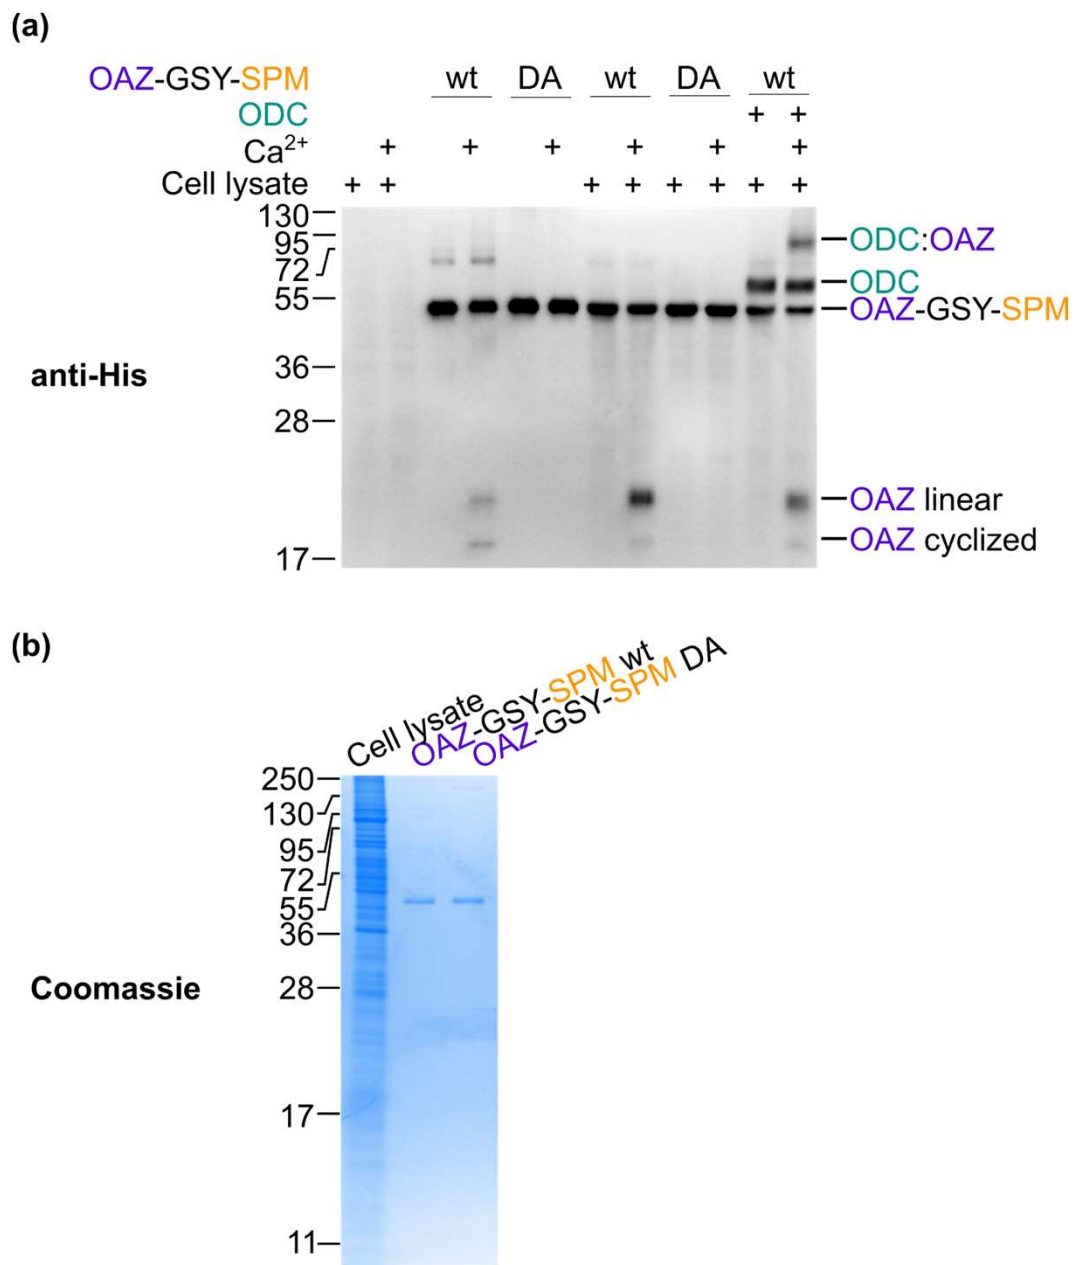

**Supplementary Fig. 5. NeissLock reaction occurred in cell lysate.** (a) Western blot to test the ability of OAZ-GSY-SPM to couple in cell lysate. 1  $\mu$ M OAZ-GSY-SPM, with or without 1  $\mu$ M ODC, was added to A431 cell lysate  $\pm$  2 mM Ca<sup>2+</sup> and incubated at 25 °C for 10 min. Samples were then blotted against anti-His, detecting His<sub>6</sub>-tags present at the N-termini of OAZ and ODC. (b) SDS-PAGE with Coomassie staining on cell lysate and wt or DA OAZ-GSY-SPM, at the same concentration as in (a). Source data are provided as a Source Data file.



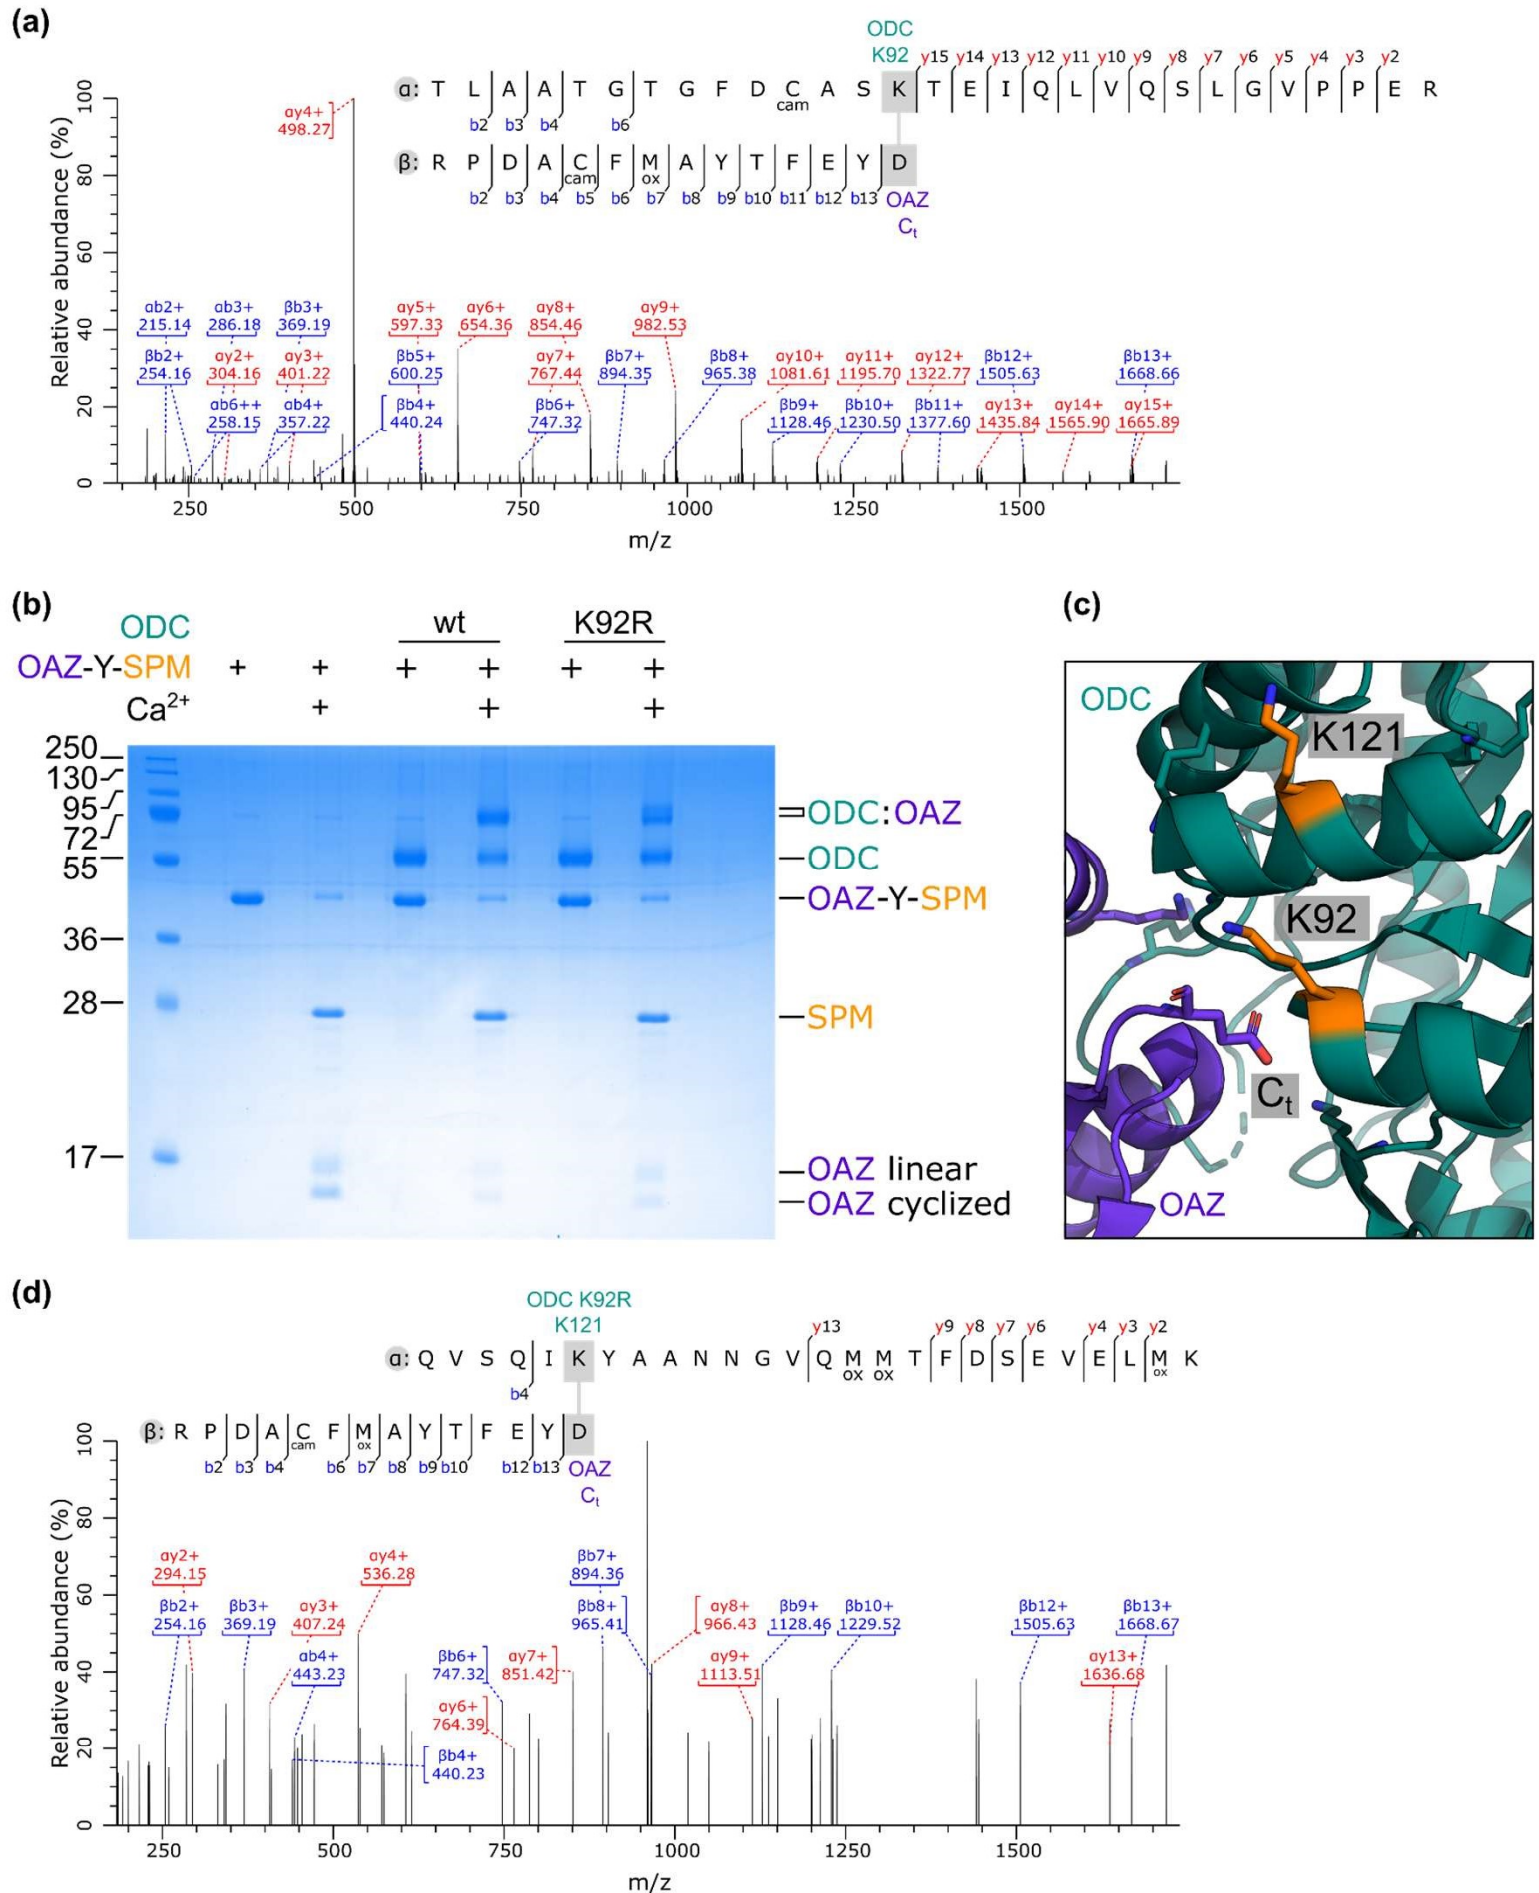

**Supplementary Fig. 6. Identification of crosslinking sites for ODC reaction.** (a) Tryptic LC-MS/MS of crosslink at K92 of wt ODC from reaction with OAZ-Y-SPM. (b) Corresponding SDS-PAGE with Coomassie staining for OAZ-Y-SPM coupling to wild-type or K92R ODC at 7.5  $\mu$ M per protein,  $\pm$  10 mM Ca<sup>2+</sup> in HBS at 37 °C for 18 h. (c) The position of K92 and K121 in the ODC/OAZ complex is shown (PDB 4zgy). (d) Tryptic LC-MS/MS of crosslink at K121 from ODC K92R reacting with OAZ-Y-SPM. cam = carbamidomethylated; ox = oxidized.

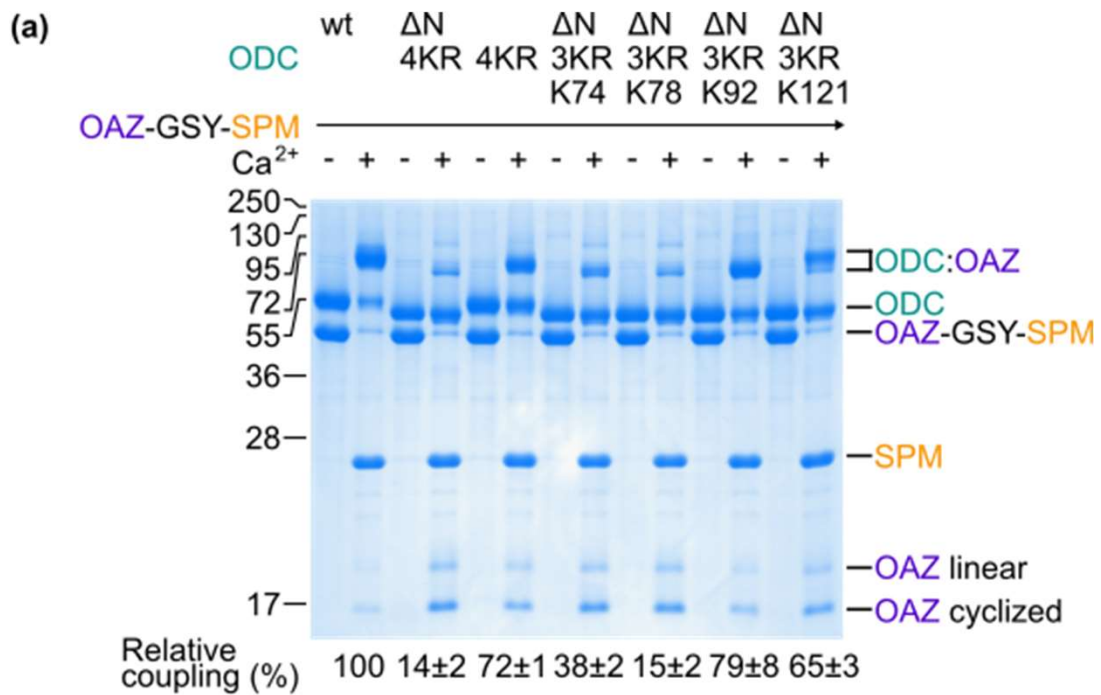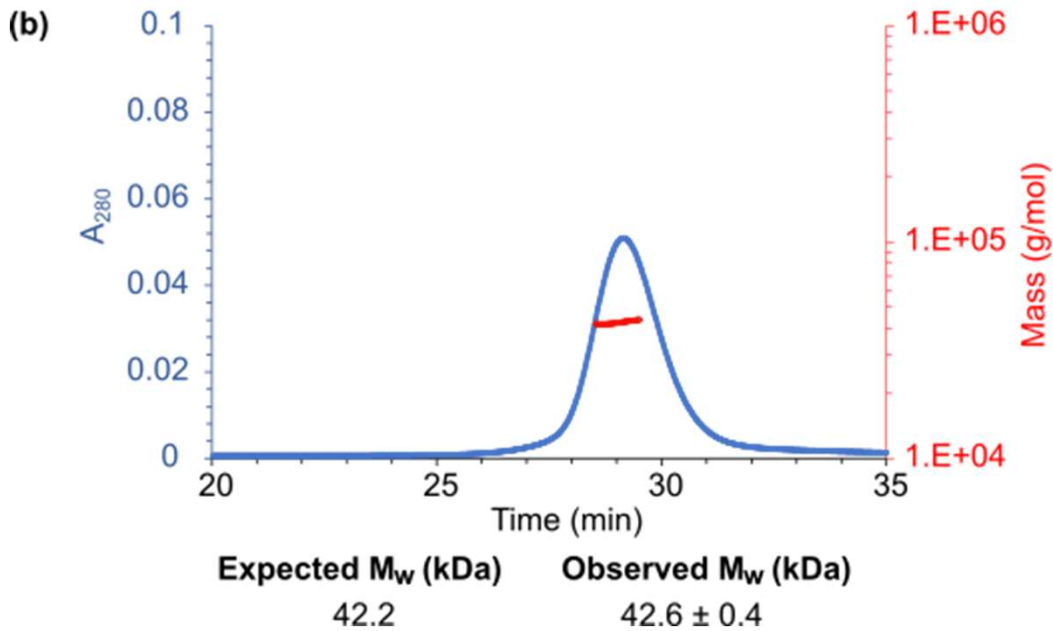

**Supplementary Fig. 7.** (a) Crosslinking sites in ODC. 10  $\mu$ M OAZ-GSY-SPM was incubated with 10  $\mu$ M of each ODC variant in HBS for 16 h at 37  $^{\circ}$ C with 10 mM Ca<sup>2+</sup>, before SDS-PAGE with Coomassie staining. Conjugation is shown relative to wt ODC (mean of triplicate  $\pm$  1 s.d.). (b) OAZ-GSY-SPM was monomeric in solution when analyzed by SEC-MALS. SEC elution time is plotted against absorbance at 280 nm (blue) and MALS signal (red). Source data are provided as a Source Data file.

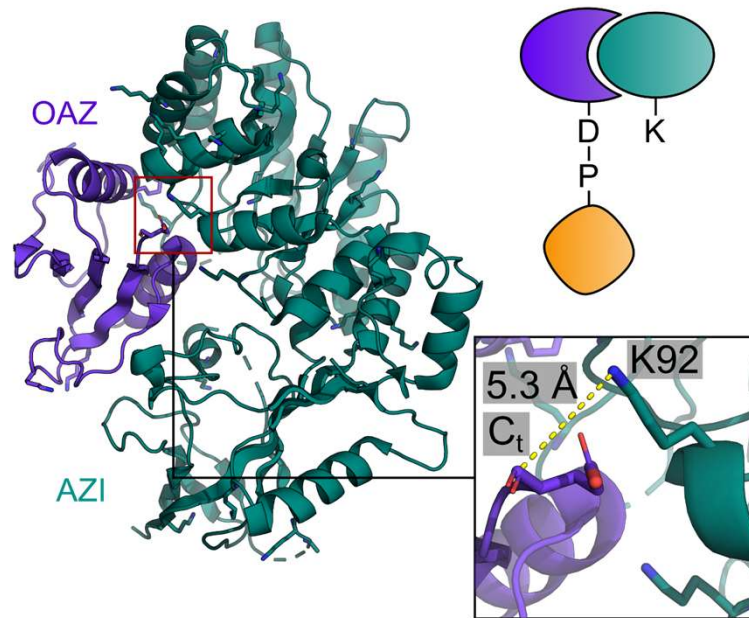

**Supplementary Fig. 8. OAZ was identified as a potential NeissLock-probe to AZI.** Crystal structure of AZI/OAZ complex (PDB 4zgz). The C-terminus of OAZ is in close proximity (5.3 Å) to AZI K92 ε-amine.

(a)

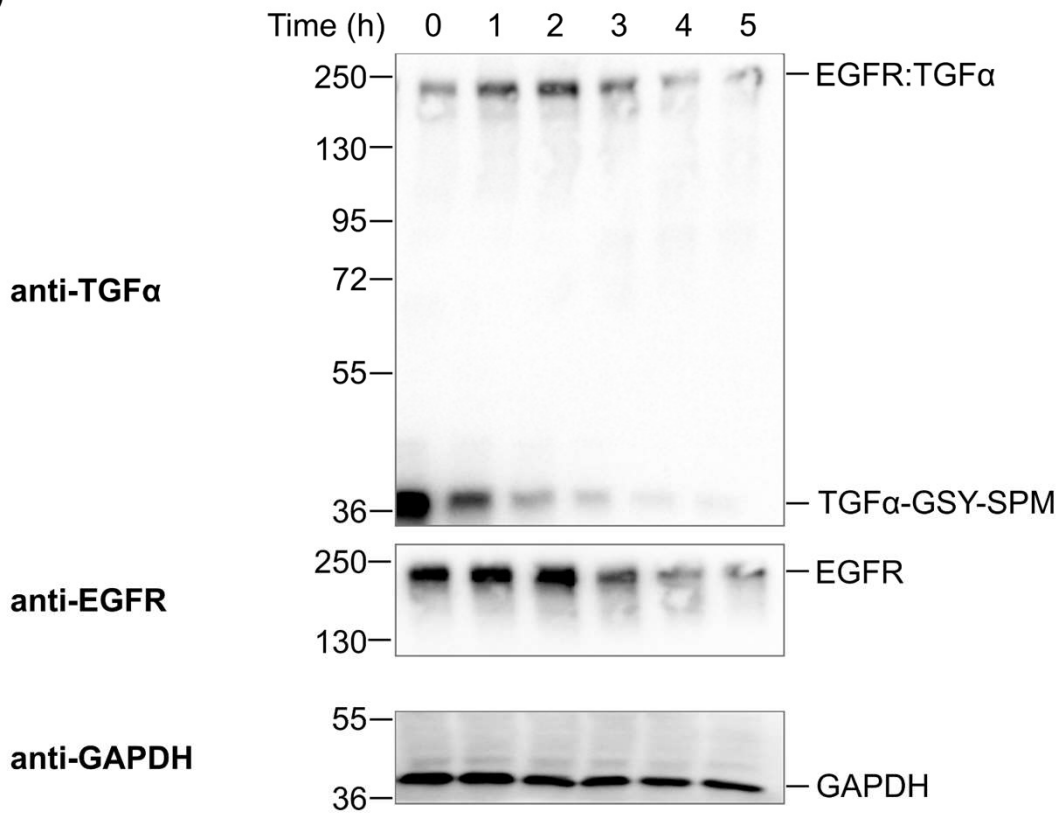

(b)

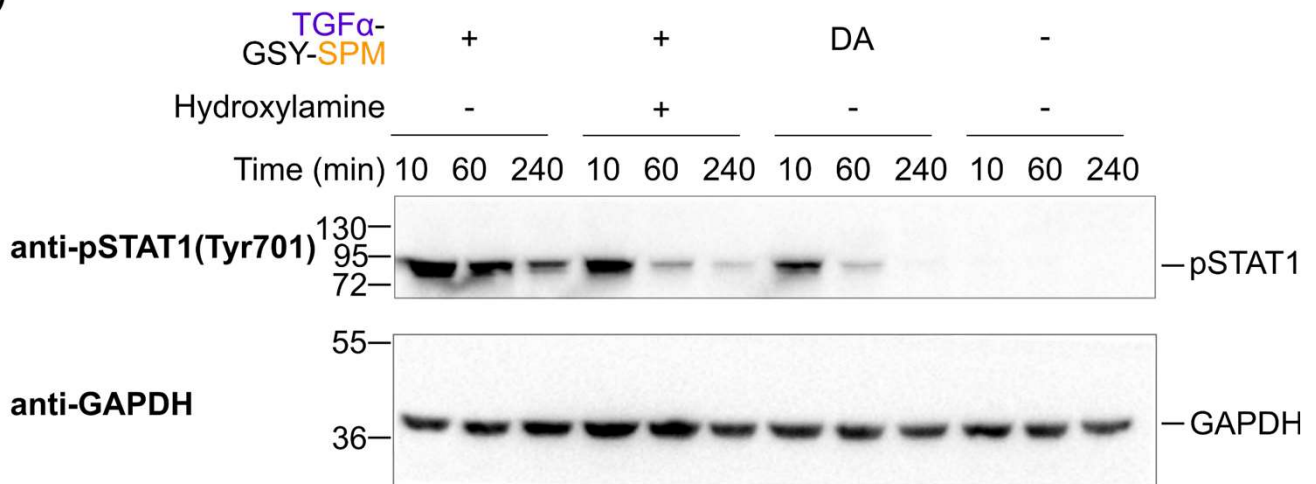

**Supplementary Fig. 9. Effect of TGF $\alpha$  conjugation to EGFR.** (a) Time-course of the EGFR:TGF $\alpha$  conjugate. A431 cells were mixed with 1  $\mu$ M TGF $\alpha$ -GSY-SPM with 2 mM Ca $^{2+}$  and then incubated with serum-free medium for the indicated time at 37  $^{\circ}$ C. Cells were blotted against TGF $\alpha$  or EGFR, with GAPDH as the sample processing control. (b) Covalent conjugation led to prolonged STAT1 phosphorylation. A431 cells were incubated with 1  $\mu$ M TGF $\alpha$ -GSY-SPM or TGF $\alpha$ -GSY-[DA]SPM with 2 mM Ca $^{2+}$ . Hydroxylamine was included as a control to inactivate the anhydride. Cells were then incubated with serum-free medium for the indicated time at 37  $^{\circ}$ C. Cell lysates were blotted against phosphorylated STAT1, or GAPDH as a loading control. Source data are provided as a Source Data file.
